# Supplementary material for: Novel dinuclear open paddle-wheel-like copper complexes involving π-stacking on the basis of chiral binaphthyl phosphoric acid {(R)-PhosH}: structural, magnetic and optical properties
Source: Royal Society of Chemistry journal article supplement (doi:10.1039/d4dt02044h), 2024-01-01
Supplement: d4dt02044h1.pdf [file d4dt02044h1.pdf]

## Supporting Information

### Novel dinuclear open paddle-wheel-like copper complexes involving $\pi$ -stacking on the basis of chiral binaphthyl phosphoric acid {(R)-PhosH}: structural, magnetic and optical properties

Humberto A. Rodríguez,<sup>a</sup> Daniel A. Cruz,<sup>a</sup> Víctor Lavín,<sup>b</sup> Juan I. Padrón,<sup>a</sup> and Pablo Lorenzo-Luis<sup>\*c</sup>

<sup>a</sup>Instituto de Productos Naturales y Agrobiología, Consejo Superior de Investigaciones Científicas (IPNA-CSIC), 38206, La Laguna, Tenerife, Islas Canarias: Email: [jipadron@ipna.csic.es](mailto:jipadron@ipna.csic.es).

<sup>b</sup>a. Departamento de Física, MALTA-Consolider Team, and IUdEA, Universidad de La Laguna, Apartado de Correos 456, San Cristóbal de La Laguna, Santa Cruz de Tenerife E-38200, Spain. Email: [vlavin@ull.es](mailto:vlavin@ull.es).

<sup>c</sup>Área de Química Inorgánica, Departamento de Química, Universidad de La Laguna, C/ Astrofísico Francisco Sánchez 3, 38071 La Laguna, Spain. Email: [plorenzo@ull.es](mailto:plorenzo@ull.es)

#### Table of contents

|                                                                 |    |
|-----------------------------------------------------------------|----|
| 1. Material and general procedure                               | 2  |
| 1.1. Synthesis procedure of the complex $1 \cdot (C_3H_6O)_2$ . | 2  |
| 1.2. Scope of metals of the first transition series             | 2  |
| 1.3. Infrared analysis.                                         | 3  |
| 1.4. NMR analysis                                               | 4  |
| 1.5. ESI-MS analysis                                            | 6  |
| 2. X-Ray diffraction analysis.                                  | 8  |
| 3. Thermal analysis.                                            | 14 |
| 4. Magnetic analysis.                                           | 15 |
| 5. Optical analysis.                                            | 19 |

## 1. Material and general procedure.

All reagents were obtained from commercial sources (Apollo®, Merck®, Thermo Fisher Scientific® and BLDpharm®) and used without any further purification. Solvents were dried and distilled before use (except for acetone). The reagents used have been obtained from the following commercial sources, indicating the purity of each of them. The following reagents were purchased from the commercial company Apollo®: (*R*)-(-)-1,1'-Binaphthyl-2,2'-diyl hydrogenphosphate 98% (CAS No. 39648-67-4), copper(II) trifluoromethanesulphonate 98% (CAS No. 34946-82-2), zinc(II) trifluoromethanesulphonate 98% (CAS No. 54010-75-2), nickel(II) trifluoromethanesulphonate 100% (CAS No. 60871-84-3). Another were purchased from the commercial company Merck®: iron(II) trifluoromethanesulfonate 85% (CAS No. 59163-91-6), iron(III) trifluoromethanesulfonate 90% (CAS No. 63295-48-7), sodium hydride 60 % dispersion in mineral oil (CAS No. 7646-69-7) and copper(II) phosphate 98% (CAS No. 7798-23-4).

Optical rotation was measured on an Anton Paar- M150 Polarimeter. HRESMS data was performed on a Waters SYNAPT XS ion mobility Q-TOF mass spectrometer by addition of methanol. The centrifugation processes were carried out with the centrifuge VWR Mega Star 3.0R.

### 1.1. Synthesis procedure of the complex $1 \cdot (C_3H_6O)_2$ .

To a 0.05 M suspension of {(*R*)PhosH} (562.7  $\mu$ mol) in dioxane, NaH (562.7  $\mu$ mol) is added, and it is left under vigorous stirring for 1 hour under nitrogen and at room temperature. At the same time, Cu(OTf)<sub>2</sub> (562.7  $\mu$ mol) is dissolved in dioxane (0.05 M), under nitrogen and at room temperature. Then the metal solution is slowly added to that of the ligand, observing a change in hue (from blue to cyan). After vigorous overnight stirring under nitrogen the formation of a white precipitate was observed and eliminated by centrifugation (4000 rpm, 4 min). The solution was allowed to dry completely in air, observing the formation of a silver-blue precipitate. This was dissolved in dichloromethane and the same amount of wet acetone, allowing it to crystallize at low temperature (4-8°C). The resulting cyan-yellow crystals were separated from the solution and analyzed by X-ray structure determination. From a practical standpoint note that by careful soft vacuum process of the crystalline sample  $1 \cdot (C_3H_6O)_2$  we obtained a completely anhydrous phase (hereafter **1**), which remained stable under normal conditions of temperature and humidity. 79 % yield (182.0 mg, 55.8  $\mu$ mol). Melting point: decomposes at 260.3°C. [ $\alpha$ ]<sub>D</sub><sup>25</sup>: -415.6 (*c* = 0.99, DMSO).

### 1.2. Scope of metals of the first transition series.

The scope of the methodology has been carried out for other metals from their respective triflic salts, summarized in **Table 1S**. The synthesis conditions have been the same as those described for complex **1** ( $C_3H_6O$ )<sub>2</sub>.

**Table 1S.** Scope of complex formation with triflic metal salts and L = {(R)PhosH}

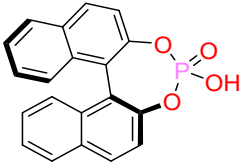
 $+ \text{M}^{n+}(\text{OTf})_n$ 

$\xrightarrow[\text{ii) Acetone (wet): DCM 1:1}]{\text{i) NaH, dioxane, RT, o.n., N}_2}$

(R)-(-)-PhosH

| Entry | L   | $\text{M}^{n+}(\text{OTf})_n$<br>(equiv) | Solvent<br>(M)    | T(°C) | Atm.         | t(h) <sup>[a]</sup> | Colour      | Yield (%) <sup>[b][c]</sup> |
|-------|-----|------------------------------------------|-------------------|-------|--------------|---------------------|-------------|-----------------------------|
| 1     | 1.0 | $\text{Cu}(\text{OTf})_2$<br>1.0         | Dioxane<br>0.0125 | RT    | $\text{N}_2$ | o.n.                | Cyan-yellow | 79%                         |
| 2     | 1.0 | $\text{Fe}(\text{OTf})_2$<br>1.0         | Dioxane<br>0.0125 | RT    | $\text{N}_2$ | o.n.                | Orange      | NC                          |
| 3     | 1.0 | $\text{Ni}(\text{OTf})_2$<br>1.0         | Dioxane<br>0.0125 | RT    | $\text{N}_2$ | o.n.                | Pale yellow | NC                          |
| 4     | 1.0 | $\text{Zn}(\text{OTf})_2$<br>1.0         | Dioxane<br>0.0125 | RT    | $\text{N}_2$ | o.n.                | Colorless   | NC                          |
| 5     | 1.0 | $\text{Fe}(\text{OTf})_3$<br>1.0         | Dioxane<br>0.0125 | RT    | $\text{N}_2$ | o.n.                | Pale orange | NC                          |
| 6     | 1.0 | $\text{Sc}(\text{OTf})_3$<br>1.0         | Dioxane<br>0.0125 | RT    | $\text{N}_2$ | o.n.                | Colorless   | NC                          |

### 1.3. Infrared analysis for complex 1.

Transmittance measurements were conducted using an ATR PRO ONE spectrometer equipped with a TGS detector, employing an accumulation of 64 scans and a resolution of  $8 \text{ cm}^{-1}$ . The aperture size was set to 7.1 mm, with a scanning speed of 2 mm/sec and a filter frequency of 10000 Hz.

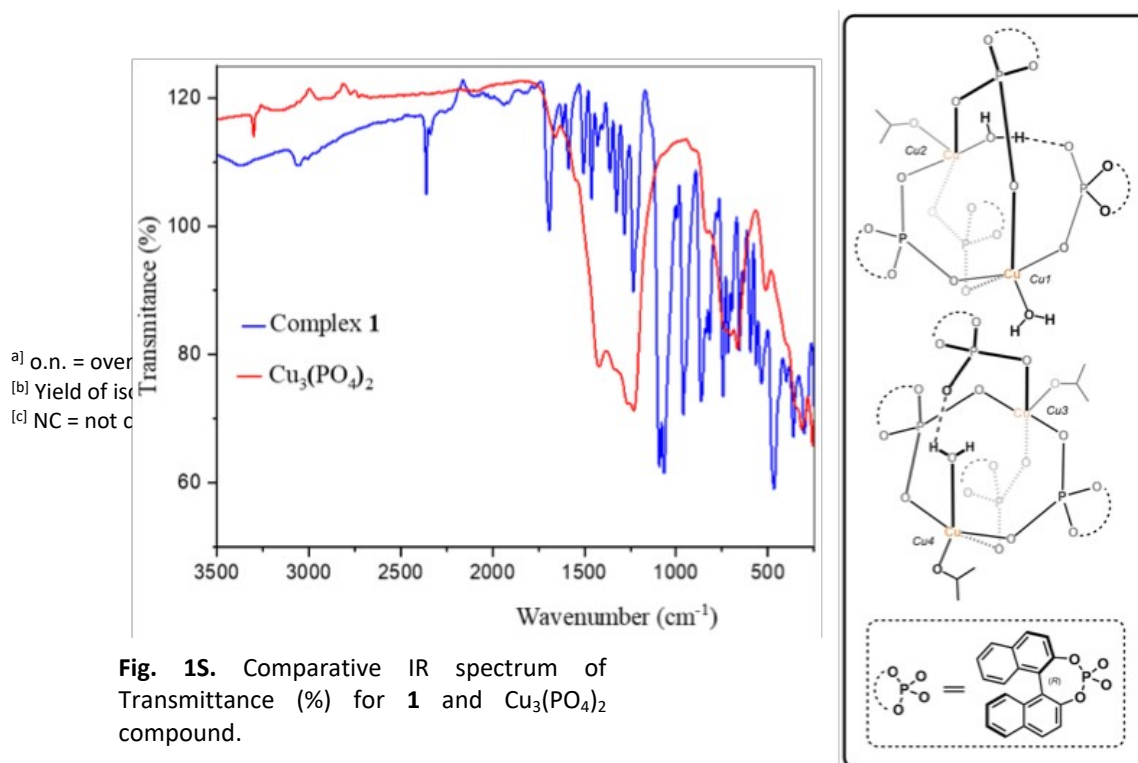

Selection FT–IR data (cm<sup>-1</sup>) vibrations:<sup>1-3</sup>

3370, 3058 vbr vs/v(H<sub>2</sub>O)

1617: δ(H<sub>2</sub>O)

3006: ν(C-H)<sub>arom</sub>

817, 836, 862: π(C-H)<sub>arom</sub>

1137: -P=O

946: ν(M-O-P)<sub>asym</sub>

1214: ν(M-O-P)<sub>sym</sub>

2339: could be assignable to the ν(OH) of the P-OH moiety due deprotonation of P–OH groups of the PO<sub>4</sub><sup>3-</sup> ligand.

#### References:

- 1 T. Prapakaran, C. I. Sathish, J. Yi, A. Vinu, and R. Murugavel, *Eur. J. Inorg. Chem.*, 2023, **26**, e202300071.
- 2 J. C. Belmont-Sánchez, M. E. García-Rubiño, A. Frontera, J. M. González-Pérez, A. Castiñeiras and J. Niclós-Gutiérrez, *Crystals*, 2021, **11**, 48 – 62.
- 3 T. Harada, Y. Hasegawa, Y. Nakano, M. Fujiki, M. Naito, T. Wada, Y. Inoue and T. Kawai, *Journal of Alloys and Compounds*, 2009, **488**, 599–602.

#### 1.4. NMR analysis for complex 1.

A nuclear magnetic resonance study has been carried out to study the chemical shifts of the organic components of the Cu-Complex. The <sup>1</sup>H-NMR and <sup>13</sup>C-NMR performed on DMSO-d<sub>6</sub> shows the characteristic aromatic signals of binolic groups, acetone and water. Chemical shifts of phosphorus atoms in **1** could not be detected.

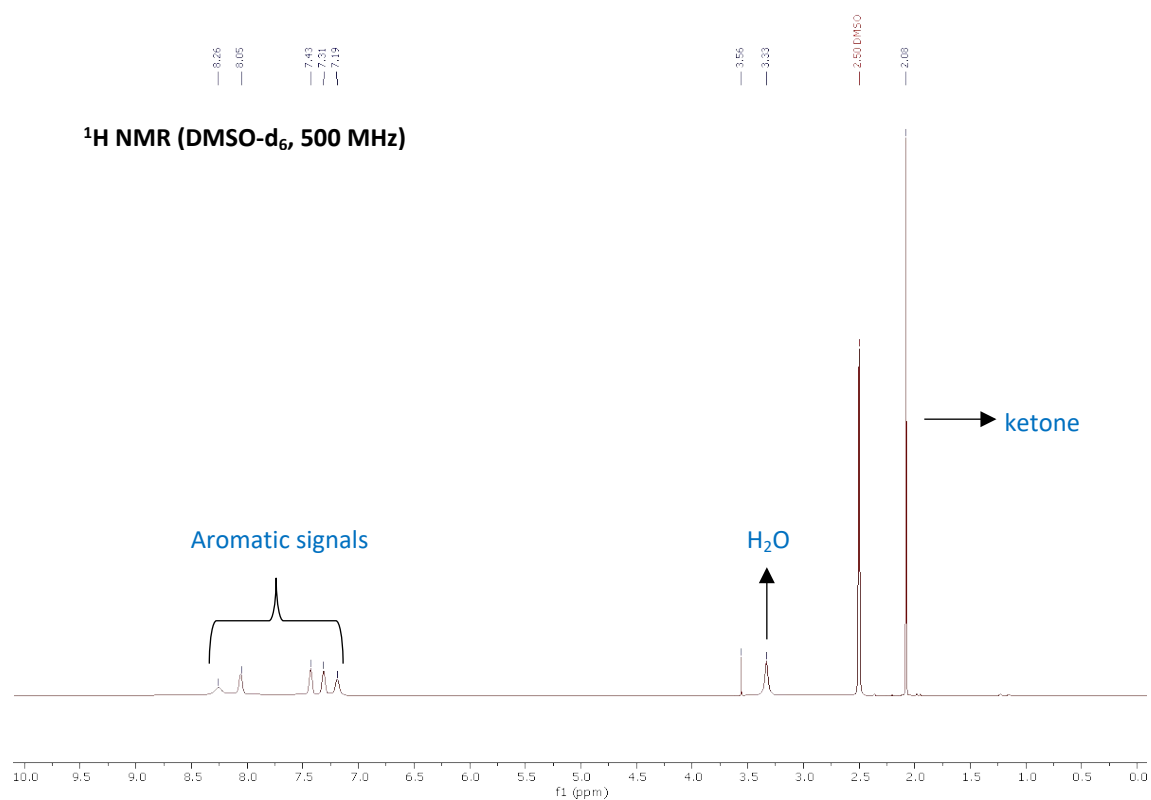

**Fig. 2S-a.** <sup>1</sup>H- NMR 500 MHz spectra of **1** in DMSO-d<sub>6</sub>.

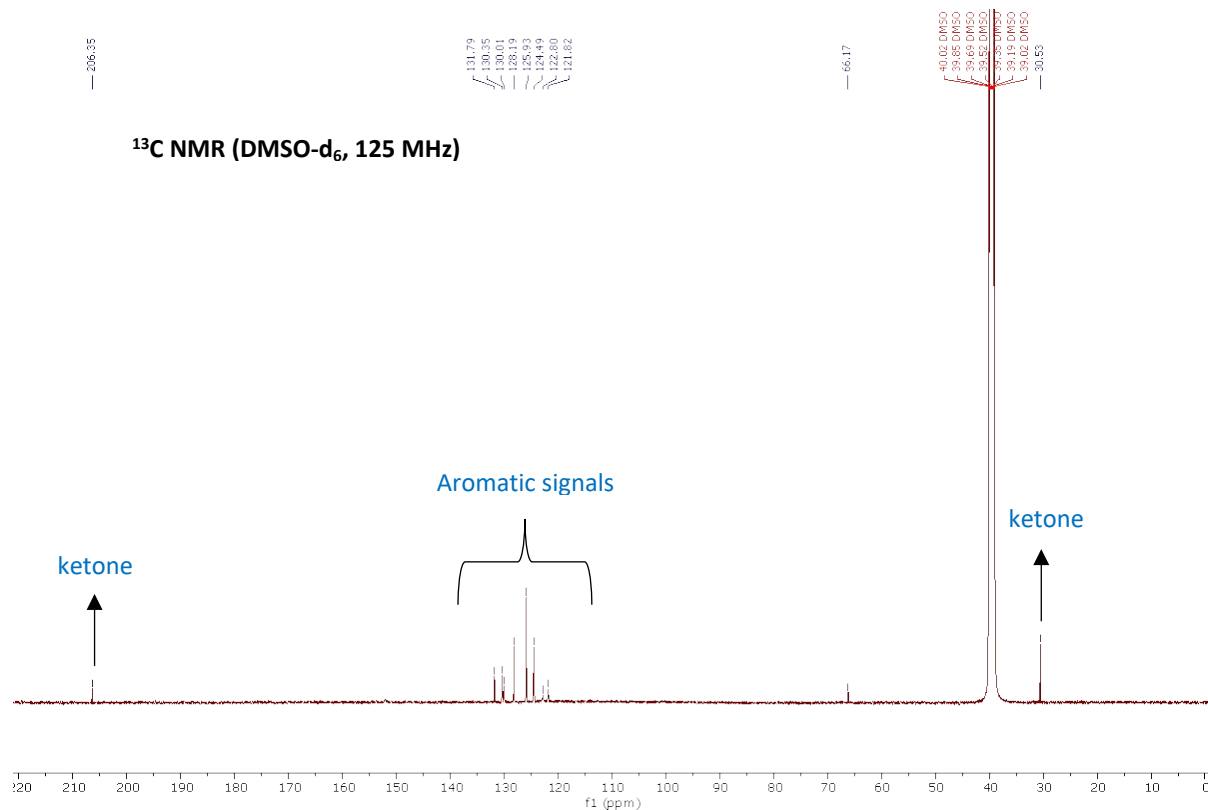

**Fig. 2S-b.** <sup>13</sup>C- NMR 125 MHz spectra of **1** in DMSO-d<sub>6</sub>.

### 1.5. ESI-MS analysis for complex **1**

A solution of 2.5 mg of **1** dissolved in 10 mL of MS-grade methanol was prepared. It was injected into the Waters SYNAPT XS ion mobility Q-TOF mass spectrometer in positive mode, being possible the identification of the fragment of [Cu<sub>2</sub>(Phos<sup>-</sup>)<sub>3</sub>]<sup>+</sup>, an adduct of the respective copper organometallic complex. On the other hand, a matrix of 15 mg of DCTB/mL in dichloromethane was prepared (DCTB = *trans*-2-[3-(4-*tert*-Butylphenyl)-2-methyl-2-propenylidene] malononitrile), allowing the identification of the fragment [Cu<sub>4</sub>(Phos<sup>-</sup>)<sub>7</sub>]<sup>+</sup>.

**Table 2S.** ESI-MS(+) of Complex **1**

| Adduct                                                            | Formula                                                                                                                     | <i>m/z</i> calc. | <i>m/z</i> exp |
|-------------------------------------------------------------------|-----------------------------------------------------------------------------------------------------------------------------|------------------|----------------|
| [Cu <sub>2</sub> (Phos <sup>-</sup> ) <sub>3</sub> ] <sup>+</sup> | C <sub>60</sub> H <sub>36</sub> O <sub>12</sub> P <sub>3</sub> <sup>63</sup> Cu <sub>2</sub>                                | 1167.0012        | 1167.0010      |
|                                                                   | C <sub>60</sub> H <sub>36</sub> O <sub>12</sub> P <sub>3</sub> <sup>63</sup> Cu <sup>65</sup> Cu                            | 1168.9994        | 1169.0021      |
| [Cu <sub>4</sub> (Phos <sup>-</sup> ) <sub>7</sub> ] <sup>+</sup> | C <sub>140</sub> H <sub>84</sub> O <sub>28</sub> P <sub>7</sub> <sup>63</sup> Cu <sub>3</sub> <sup>65</sup> Cu              | 2683.0478        | 2683.0569      |
|                                                                   | C <sub>140</sub> H <sub>84</sub> O <sub>28</sub> P <sub>7</sub> <sup>63</sup> Cu <sub>2</sub> <sup>65</sup> Cu <sub>2</sub> | 2685.0460        | 2685.0569      |

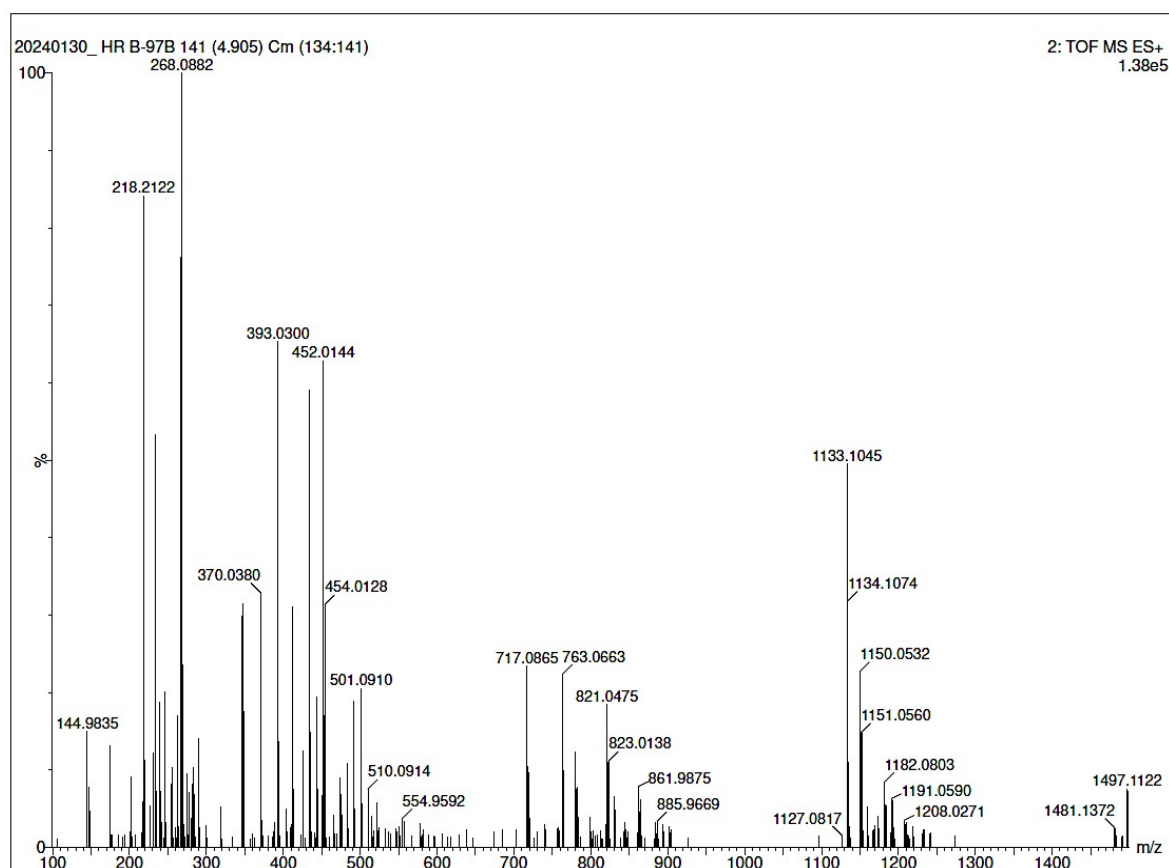

**Fig. 3S-a.** Experimental profile of the [Cu<sub>2</sub>(Phos<sup>-</sup>)<sub>3</sub>]<sup>+</sup> cationic moiety.

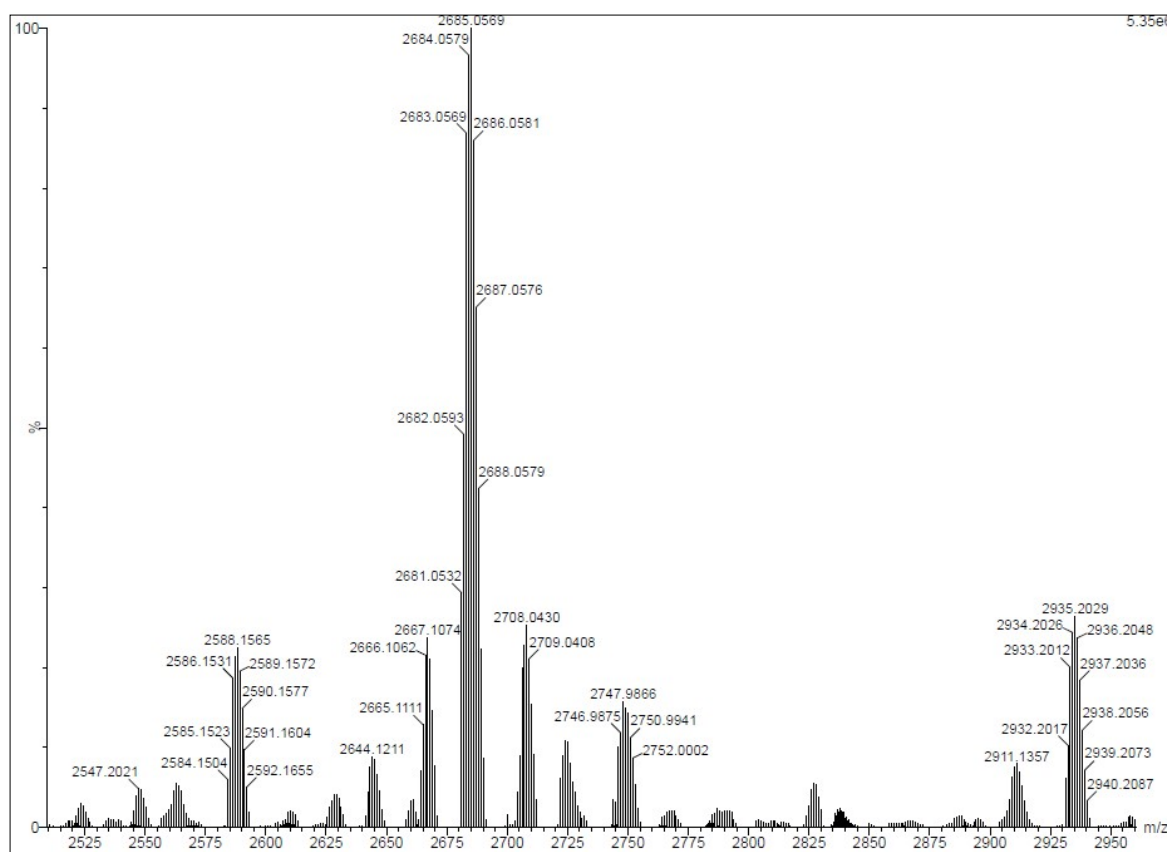

**Fig. 3S-b.** Experimental profile of the [Cu<sub>4</sub>(Phos')<sub>7</sub>]<sup>+</sup> cationic moiety.

## 2.0. X-Ray diffraction analysis for complex **1** (C<sub>3</sub>H<sub>6</sub>O)<sub>2</sub>.

Data of complex **1** (C<sub>3</sub>H<sub>6</sub>O)<sub>2</sub>, was obtained on a Rigaku Oxford Diffraction SuperNova (Cu) X-ray micro-focus source at room temperature, with Cu-K<sub>α</sub> radiation ( $\lambda = 1.54184 \text{ \AA}$ ). The data were indexed, integrated and scaled with the CrysAlisPro 1.171.43.104a (Rigaku Oxford Diffraction, 2023). The crystal structure was solved by direct methods using the SHELXT 2018/2 software,<sup>1</sup> with the Olex2 1.5 platform. The structure was refined by the full-matrix least-squares technique on  $F^2$  with the SHELXL 2019/3 program.<sup>2</sup> All non-hydrogen atoms were refined anisotropically. The hydrogen atoms except those attached to the O-atoms of water molecules were introduced their idealized positions and refined in the isotropic approximation. Positional and anisotropic atomic displacement parameters were refined for all non-hydrogen atoms. Since we have used SQUEZZE procedure due to disorder of the dissolvent, the presence of the corresponding acceptor (OW2----H2WB) has probably been eliminated. The number of  $(I_{\text{obs}} - I_{\text{calc}})/\text{Sigma}(W) > 10$  Outliers, was due to the presence of a small twin component that has not been considered in the data reduction. The asymmetric unit showing two independent neutral complexes in **1**·(C<sub>3</sub>H<sub>6</sub>O)<sub>2</sub>: Cu1/Cu2 (I) and Cu3/Cu4 (II) is shown in **Fig. 4S**. The Flack parameter was refined to a value of -0.004(7) confirming the absolute structure.<sup>3</sup> Other experimental details are given in **Tables 3S** and **4S**. Mercury 2023.3.1 (CCDC, 2001-2013) program was used to visualize and study the hydrogen bonds and another interaction; whereas the Diamond 4.6.8 software was used to generate the structural drawings for this manuscript.<sup>4</sup> Crystallographic data for **1**·(C<sub>3</sub>H<sub>6</sub>O)<sub>2</sub> has been deposited in the Cambridge Crystallographic Data Center, with the CCDC number CCDC 2345065.

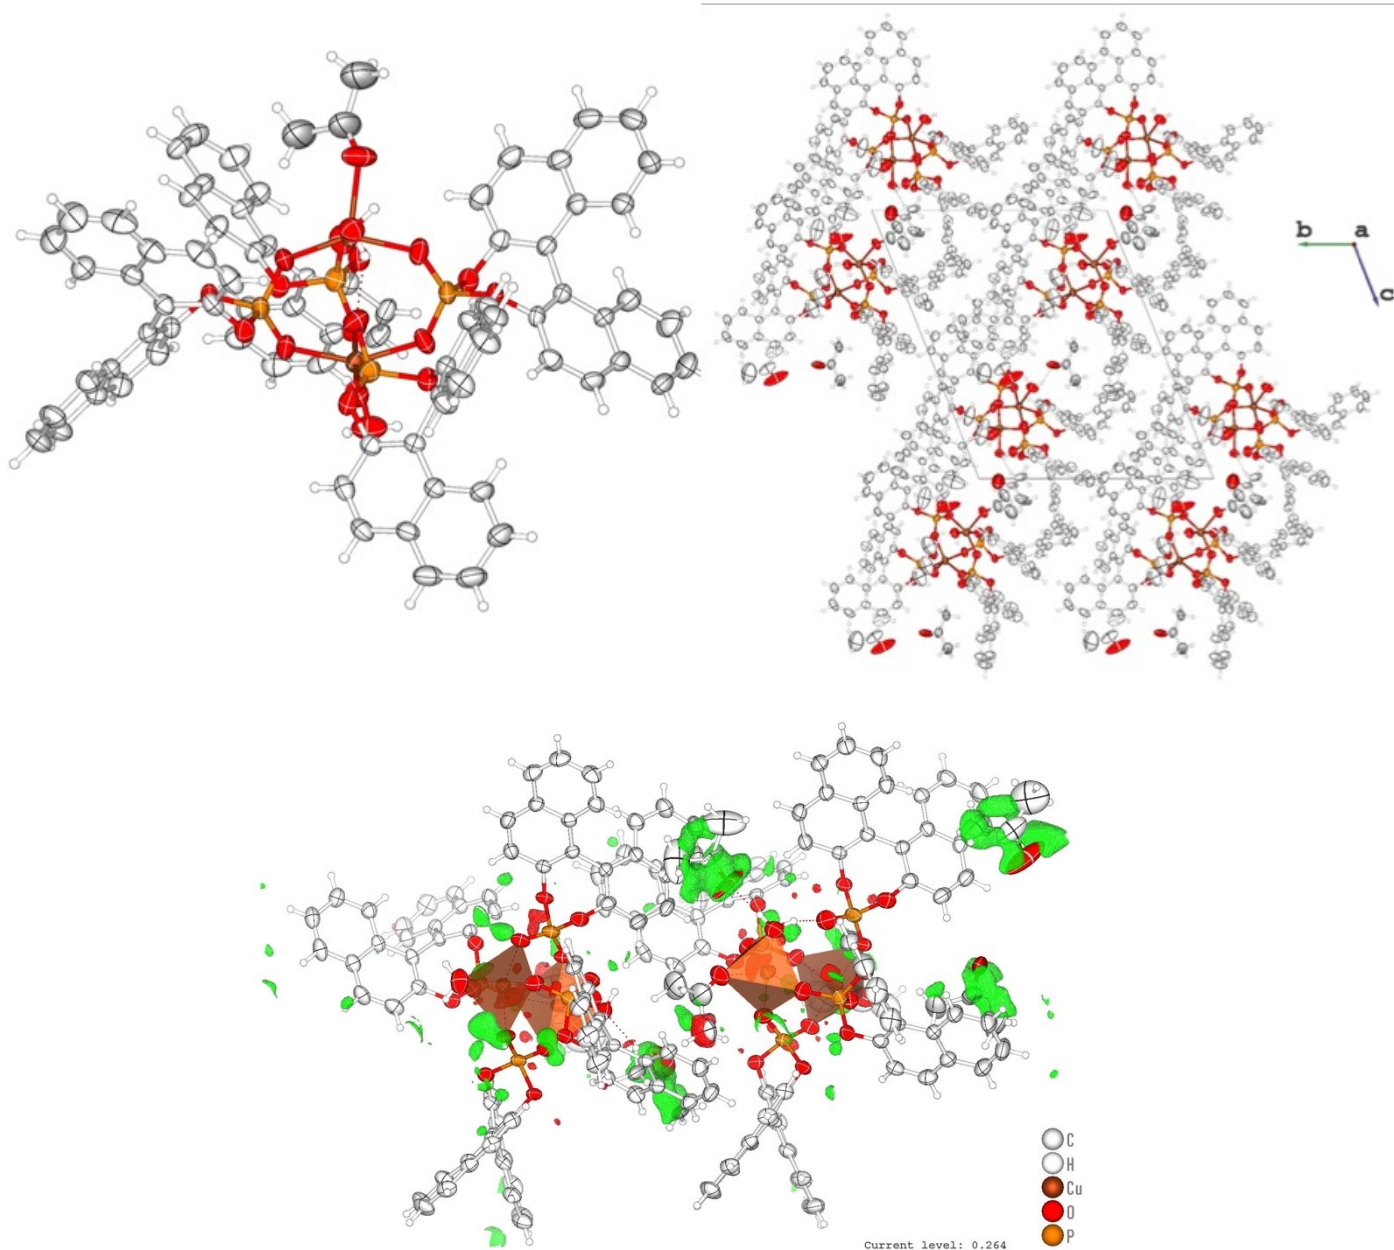

**Fig. 4S.** Structural drawing for complex **1** ( $\text{C}_3\text{H}_6\text{O}$ )<sub>2</sub>: Cu1/Cu2 (I) and Cu3/Cu4 (II), ADP ellipsoids are shown at the 50% probability level; as well as residual density graph showing the difficulty of interpretation of the ketone molecules present.

**Table 3S.** Crystal data and structure refinement for complex **1·(C<sub>3</sub>H<sub>6</sub>O)<sub>2</sub>**

|                                             |                                                                                  |
|---------------------------------------------|----------------------------------------------------------------------------------|
| Empirical formula                           | C <sub>175</sub> H <sub>132</sub> Cu <sub>4</sub> O <sub>40</sub> P <sub>8</sub> |
| Formula weight                              | 3376.72                                                                          |
| Temperature/K                               | 298(2)                                                                           |
| Crystal system                              | triclinic                                                                        |
| Space group                                 | P1                                                                               |
| Flack parameter                             | -0.004(7)                                                                        |
| a/Å                                         | 11.2551(2)                                                                       |
| b/Å                                         | 18.5480(3)                                                                       |
| c/Å                                         | 22.4544(5)                                                                       |
| α/°                                         | 107.266(2)                                                                       |
| β/°                                         | 101.455(2)                                                                       |
| γ/°                                         | 105.492(2)                                                                       |
| Volume/Å <sup>3</sup>                       | 4112.34(15)                                                                      |
| Z                                           | 1                                                                                |
| ρ <sub>calc</sub> /cm <sup>3</sup>          | 1.364                                                                            |
| μ/mm <sup>-1</sup>                          | 1.967                                                                            |
| F(000)                                      | 1738                                                                             |
| Crystal size/mm <sup>3</sup>                | 0.215 × 0.195 × 0.158                                                            |
| Radiation                                   | Cu Kα (λ = 1.54184)                                                              |
| 2θ range for data collection/°              | 8.008 to 146.33                                                                  |
| Index ranges                                | -13 ≤ h ≤ 13, -23 ≤ k ≤ 22, -25 ≤ l ≤ 27                                         |
| Reflections collected                       | 67768                                                                            |
| Independent reflections                     | 30348 [R <sub>int</sub> = 0.0326, R <sub>sigma</sub> = 0.0369]                   |
| Data/restraints/parameters                  | 30348/197/2107                                                                   |
| Goodness-of-fit on F <sup>2</sup>           | 1.051                                                                            |
| Final R indexes [I ≥ 2σ (I)]                | R <sub>1</sub> = 0.0507, wR <sub>2</sub> = 0.1526                                |
| Final R indexes [all data]                  | R <sub>1</sub> = 0.0548, wR <sub>2</sub> = 0.1580                                |
| Largest diff. peak/hole / e Å <sup>-3</sup> | 0.79/-0.71                                                                       |

**Table 4S.** Asymmetric unit of the two independent neutral complexes in  $1 \cdot (C_3H_6O)_2$ : Cu1/Cu2 (I) and Cu3/Cu4 (II)

**Cu1/Cu2 (I) complex**

Geometric of the **CuO<sub>5</sub> environment** (distance bonds in Å).

| Cu1     |          | Cu2     |          |
|---------|----------|---------|----------|
| Cu1 O43 | 2.001(4) | Cu2 O24 | 1.947(4) |
| Cu1 O33 | 1.956(4) | Cu2 O34 | 1.935(5) |
| Cu1 O13 | 1.945(5) | Cu2 O44 | 1.956(4) |
| Cu1 O23 | 1.988(4) | Cu2 O2W | 1.942(5) |
| Cu1 O1W | 2.141(5) | Cu2 O2A | 2.222(5) |

Geometric of the **CuO<sub>5</sub> environment** (angle bonds in °).

| Cu1         |          | Cu2         |          |
|-------------|----------|-------------|----------|
| O43 Cu1 O1W | 97.0(3)  | O24 Cu2 O44 | 146.7(2) |
| O33 Cu1 O43 | 87.8(2)  | O24 Cu2 O2A | 116.7(2) |
| O33 Cu1 O23 | 89.7(2)  | O34 Cu2 O24 | 90.6(2)  |
| O33 Cu1 O1W | 89.1(2)  | O34 Cu2 O44 | 94.7(2)  |
| O13 Cu1 O43 | 91.3(2)  | O34 Cu2 O2W | 175.2(2) |
| O13 Cu1 O33 | 178.2(2) | O34 Cu2 O2A | 91.3(3)  |
| O13 Cu1 O23 | 90.4(2)  | O44 Cu2 O2A | 96.1(3)  |
| O13 Cu1 O1W | 92.5(2)  | O2W Cu2 O24 | 86.4(2)  |
| O23 Cu1 O43 | 149.1(2) | O2W Cu2 O44 | 89.8(2)  |
| O23 Cu1 O1W | 113.7(3) | O2W Cu2 O2A | 86.7(2)  |

**Addison parameter tau ( $\tau_s$ )** (angle bonds in °).<sup>5</sup>

| Cu1 ( $\tau = 0.49$ ) |          | Cu2 ( $\tau = 0.48$ ) |          |
|-----------------------|----------|-----------------------|----------|
| O13 Cu1 O33           | 178.2(2) | O24 Cu2 O44           | 146.7(2) |
| O23 Cu1 O43           | 149.1(2) | O34 Cu2 O2W           | 175.2(2) |

$\{\tau = (\beta - \alpha)/60$ , where  $\beta - \alpha$  are the two largest ligand–metal–ligand angles of the coordination sphere}.

Geometric of the **PO<sub>4</sub> environment** (distance bonds in Å).

| P1     |          | P2     |          | P3     |          | P4     |          |
|--------|----------|--------|----------|--------|----------|--------|----------|
| P1 O11 | 1.607(4) | P2 O22 | 1.602(5) | P3 O32 | 1.605(4) | P4 O41 | 1.610(4) |
| P1 O12 | 1.612(4) | P2 O24 | 1.496(5) | P3 O33 | 1.477(5) | P4 O43 | 1.489(5) |
| P1 O13 | 1.485(5) | P2 O21 | 1.607(4) | P3 O31 | 1.598(5) | P4 O42 | 1.589(4) |
| P1 O14 | 1.467(5) | P2 O23 | 1.488(5) | P3 O34 | 1.488(5) | P4 O44 | 1.493(5) |

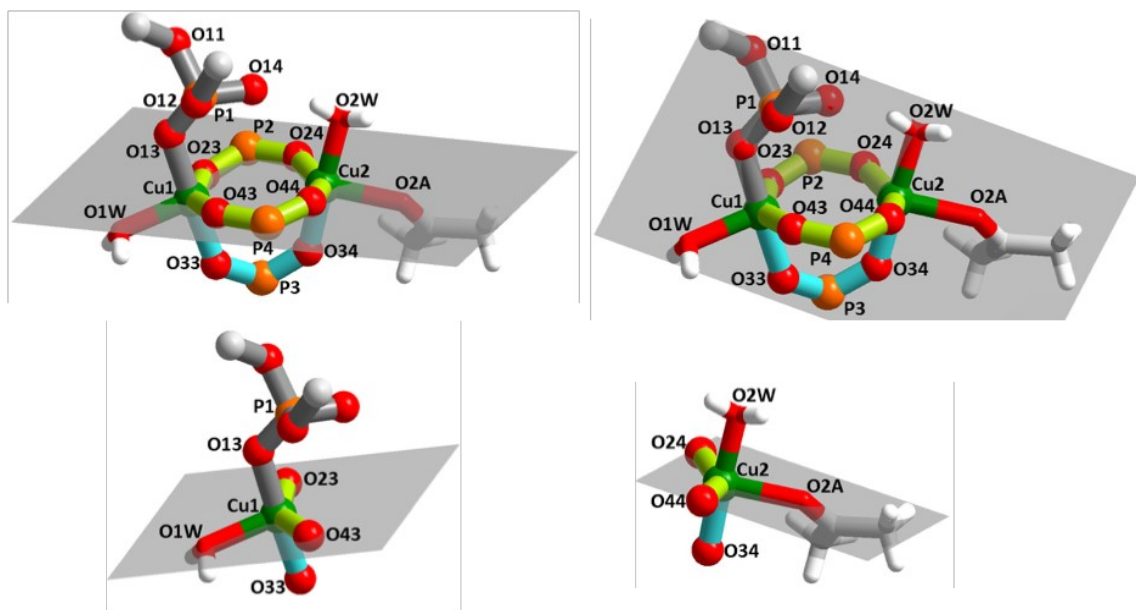

**Fig. 5S-a.** Planes of the eight- and five-members rings (P-O-Cu-O-P-O-Cu-O) and (Cu-O-P-O-Cu) and the respective equatorial CuO<sub>3</sub> planes. Visualized in the Cu1/Cu2 (I) complex.

#### Cu3/Cu4(I) complex

Geometric of the **CuO<sub>5</sub> environment** (distance bonds in Å).

| Cu3     |          | Cu4     |          |
|---------|----------|---------|----------|
| Cu3 O63 | 2.044(5) | Cu4 O64 | 1.941(5) |
| Cu3 O73 | 1.930(4) | Cu4 O74 | 1.951(5) |
| Cu3 O53 | 1.917(4) | Cu4 O84 | 1.939(5) |
| Cu3 O3A | 2.170(6) | Cu4 O4A | 2.239(5) |
| Cu3 O83 | 2.021(5) | Cu4 O4W | 1.977(5) |

Geometric of the **CuO<sub>5</sub> environment** (angle bonds in °).

| Cu3         |          | Cu4         |          |
|-------------|----------|-------------|----------|
| O63 Cu3 O3A | 101.1(3) | O64 Cu4 O74 | 93.4(2)  |
| O73 Cu3 O63 | 90.0(2)  | O64 Cu4 O4A | 95.8(2)  |
| O73 Cu3 O3A | 88.3(2)  | O64 Cu4 O4W | 90.8(2)  |
| O73 Cu3 O83 | 90.0(2)  | O74 Cu4 O4A | 97.2(2)  |
| O53 Cu3 O63 | 91.6(2)  | O74 Cu4 O4W | 175.7(2) |
| O53 Cu3 O73 | 175.3(2) | O84 Cu4 O64 | 158.9(2) |
| O53 Cu3 O3A | 87.1(2)  | O84 Cu4 O74 | 90.0(2)  |
| O53 Cu3 O83 | 91.9(2)  | O84 Cu4 O4A | 104.5(2) |
| O83 Cu3 O63 | 136.0(2) | O84 Cu4 O4W | 85.9(2)  |
| O83 Cu3 O3A | 122.9(2) | O4W Cu4 O4A | 82.7(2)  |

Addison parameter tau ( $\tau_s$ ) (angle bonds in  $^\circ$ ).<sup>5</sup>

| Cu3 ( $\tau = 0.66$ ) |          | Cu4 ( $\tau = 0.28$ ) |          |
|-----------------------|----------|-----------------------|----------|
| O53 Cu3 O73           | 175.3(2) | O74 Cu4 O4W           | 175.7(2) |
| O83 Cu3 O63           | 136.0(2) | O84 Cu4 O64           | 158.9(2) |

$\{\tau = (\beta - \alpha)/60$ , where  $\beta - \alpha$  are the two largest ligand–metal–ligand angles of the coordination sphere}.

Geometric of the **PO<sub>4</sub> environment** (distance bonds in Å).

| P5     |          | P6     |          | P7     |          | P8     |          |
|--------|----------|--------|----------|--------|----------|--------|----------|
| P5 O52 | 1.618(5) | P6 O61 | 1.603(4) | P7 O72 | 1.587(5) | P8 O81 | 1.613(5) |
| P5 O53 | 1.499(5) | P6 O62 | 1.607(5) | P7 O71 | 1.601(4) | P8 O82 | 1.600(5) |
| P5 O51 | 1.612(6) | P6 O64 | 1.498(5) | P7 O73 | 1.490(5) | P8 O84 | 1.489(5) |
| P5 O54 | 1.480(5) | P6 O63 | 1.480(5) | P7 O74 | 1.486(5) | P8 O83 | 1.482(5) |

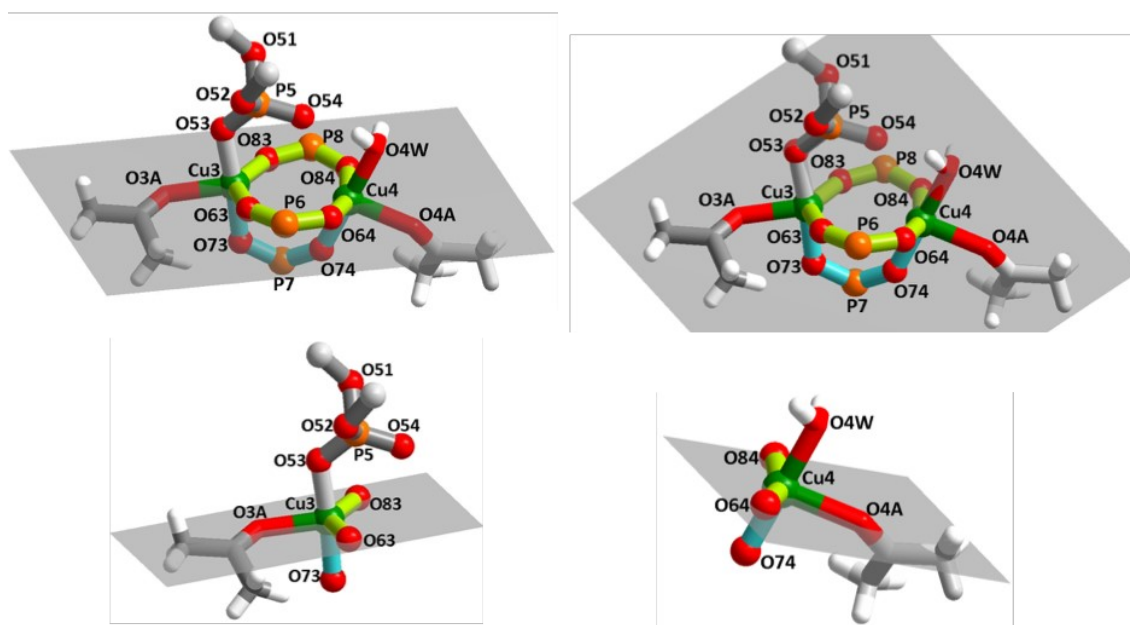

**Fig. S5-b.** Planes of the eight- and five-members rings (P-O-Cu-O-P-O-Cu-O) and (Cu-O-P-O-Cu) and the respective equatorial CuO<sub>3</sub> planes. Visualized in the Cu3/Cu4 (II) complex.

## References:

- 1 O. V. Dolomanov, L. J. Bourhis, R. J. Gildea, J. A. K. Howard and H. Puschmann, OLEX2: a complete structure solution, refinement and analysis program. *J. Appl. Crystallogr.* 2009, **42**, 339–341.
- 2 Sheldrick, G. M. Crystal structure refinement with SHELXL, *Acta Cryst.* 2015, **C71**, 3–8.
- 3 (a) Parsons, Flack and Wagner, *Acta Cryst.* 2013, **B69**, 249-259; (b) H.D. Flack and G. Bernardinelli, *Acta Cryst.* 1999, **A55**, 916-925; (c) D.J. Watkin and R.I. Cooper, *Chemistry*, 2020, 2(4), 796-804.
- 4 (a) Mercury 2023.3.1, Copyright © CCDC, 2001-2023; (b) K Brandenburg, DIAMOND-Crystal and Molecular Structure Visualization Version 4.6.8; Crystal Impact GbR: Bonn, Germany, 2022.
- 5 (a) A.W. Addison, T.N. Rao, J. Reedijk, J. van Rijn and G.C. Verschoor, *J. Chem. Soc., Dalton Trans.*, 1984, 1349-1356; (b) M. Sharma, M. Sharma and N. Sharma, *Arabian Journal of Chemistry*, 2019, **12**, 5268–5277.

## 3. Thermal analysis for complex 1

Thermograms of TGA and DSC were obtained using a simultaneous TGA/DSC Discovery SDT 650 (TA Instruments). Measurements were performed with hermetically crimped Tzero aluminum crucibles (40  $\mu$ L, 5 mg of **1**) under nitrogen atmosphere at a flow rate of 50 mL/min<sup>-1</sup> from 26 to 500 C (at a heating rate of 10 C min<sup>-1</sup>). The number of decomposition steps was identified using the derivative thermogravimetric curve (DTG).

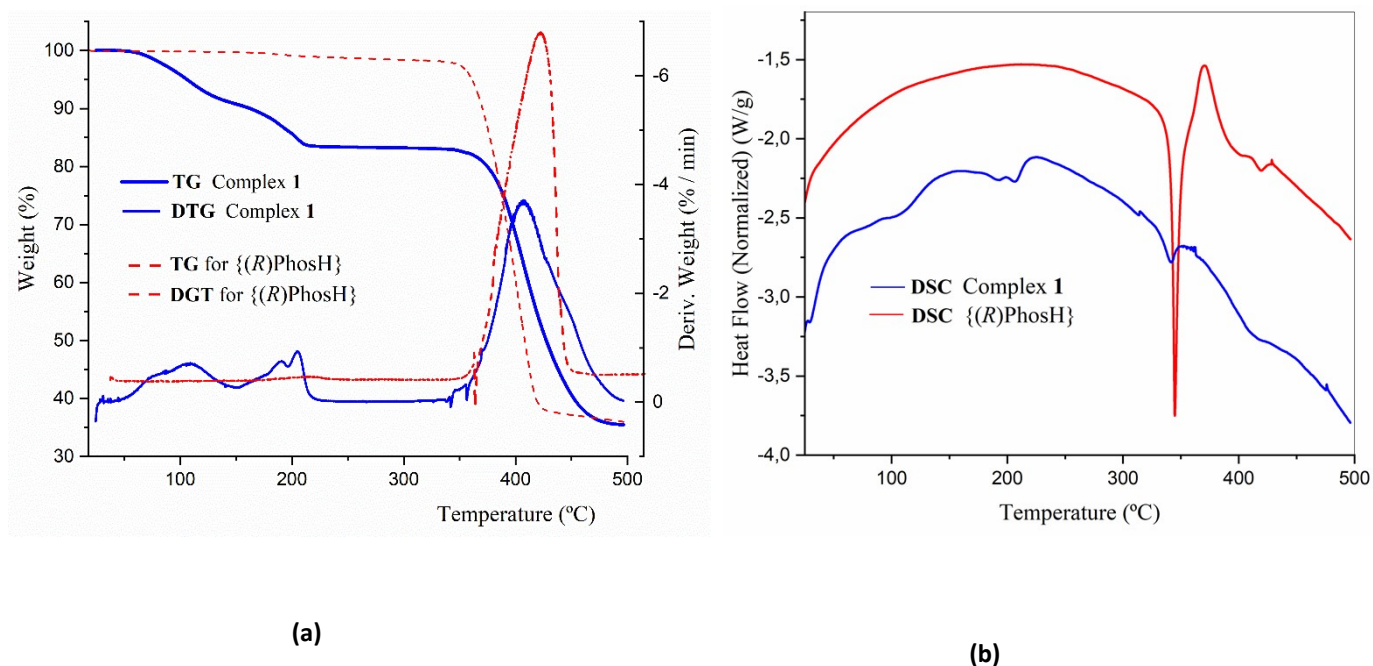

**Fig. 6S.** Comparative curves TG-DTG (a) and DSC (b) for **1** and compared with binaphthyl phosphoric acid {(R)-PhosH}.

## 4. Magnetic analysis for complex 1

### 4.1 Pd standard verification data prior to sample measurements.

Standard Pd verification using a 265.6 mg cylinder encapsulated with cotton in the SQUID Magnetometer- MPMS-3 equipment at 298 K, following a verification measurement sequence in DC mode. The measurement of the reference material shows an experimental deviation of less than 1% compared to the tabulated reference values.

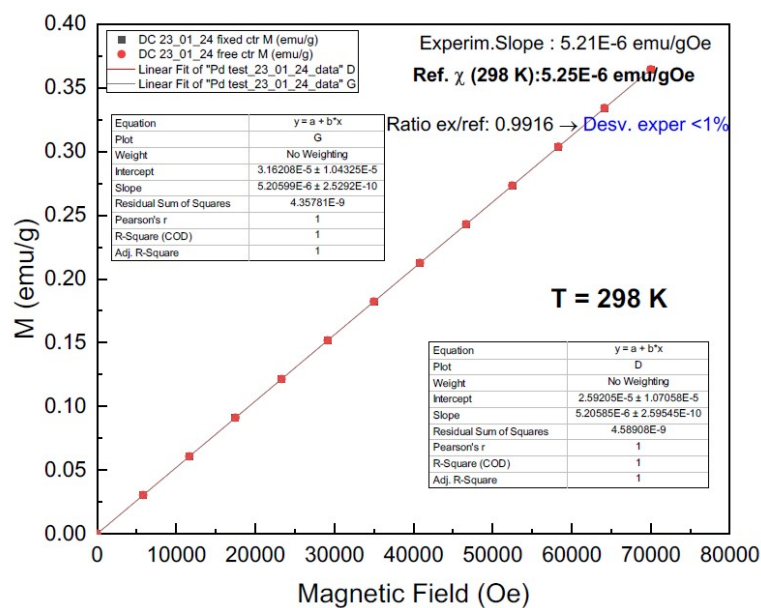

**Fig. 7S-a.** Verification in the SQUID Magneometer-MPMS-3 equipment.

## 4.2 Characterization.

A capsule is prepared with 23.3 mg of **1** and cotton, to compact and prevent the movement of the powdered sample when changing the temperature and/or the applied magnetic field. The measurement is carried out in a SQUID Magnetometer (Model MPMS-3, Quantum Design). The net magnetic signal is in the range of  $10^{-3}$  to  $10^{-4}$  emu for M-T measurements at 0.1T (1 kOe) applied magnetic field. In the measurements against a magnetic field, 0.16 emu is reached at 7 T (70 kOe) and 1.8 K. Considering the amount of sample measured, the magnetization values turn out to be appreciable. The magnetic signal shows an optimal magnitude with an extremely low noise level.

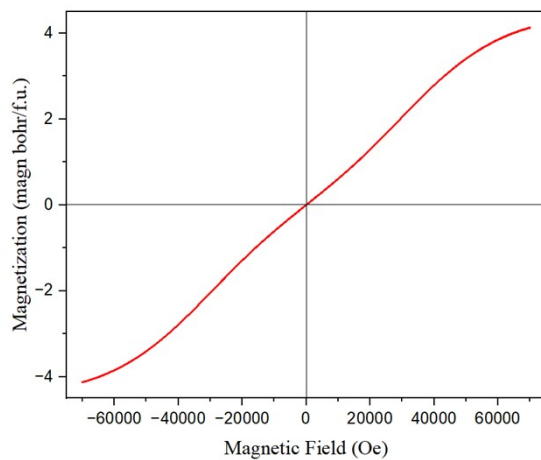

(a)

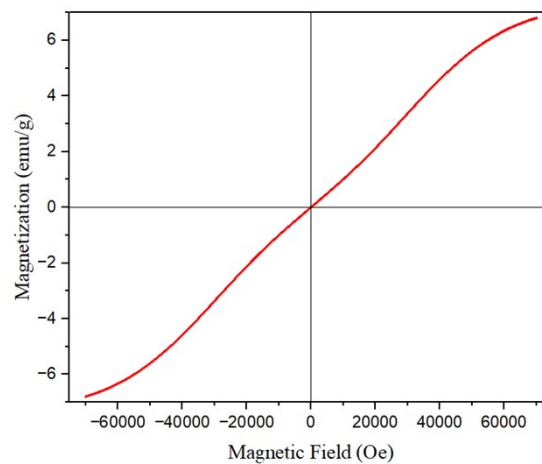

(b)

**Fig. 7S-b.** Magnetization measurements against magnetic field, up to 7 Tesla (70 kOe), of Cu-Complex sample at low temperature (1.8 K) in different units a) Magnetization (magn bohr/f.u.) vs. Magnetic Field (Oe) and b) Magnetization (emu/g) vs. Magnetic Field (Oe).

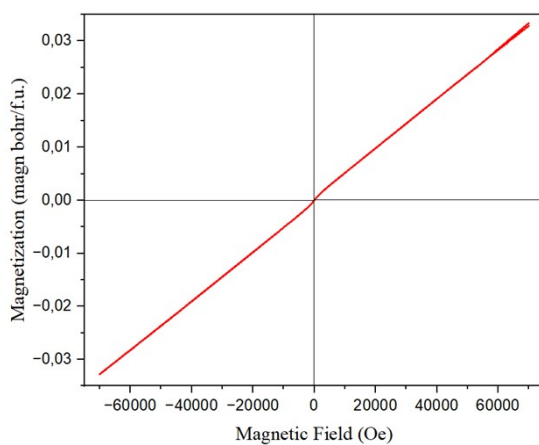

(a)

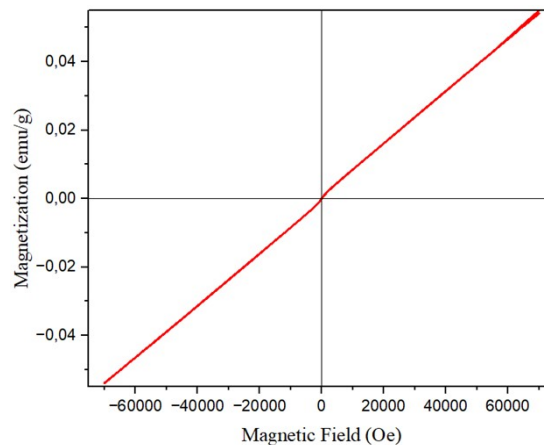

(b)

**Fig. 7S-c.** Magnetization measurements against magnetic field, up to 7 Tesla (70 kOe), of Cu-Complex sample at low temperature (300 K) in different units a) Magnetization (magn bohr/f.u.) vs. Magnetic Field (Oe) and b) Magnetization (emu/g) vs. Magnetic Field (Oe).

The linear fitting of the inverse of the magnetic susceptibility has been performed for both the ZFC and FC curves across various temperature ranges, with fittings at higher temperatures being more representative. From the range of values obtained, the error in the experimental value of the paramagnetic moment has been estimated.

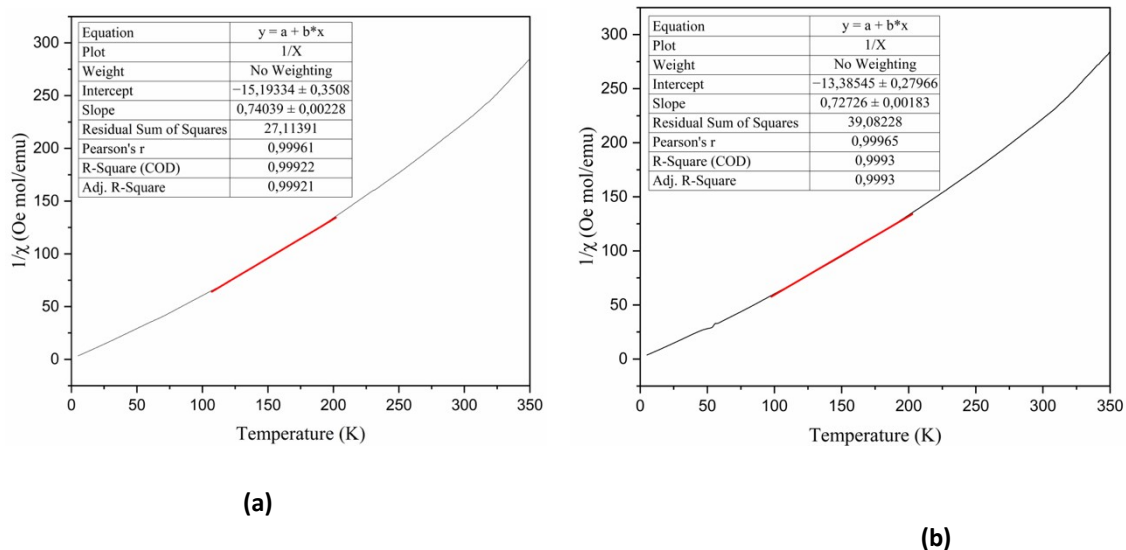

**Fig. 7S-d:** a) The ZFC curve of  $1/\chi$  versus temperature and its linear fit and b) The FC curve of  $1/\chi$  versus temperature and its linear fit.

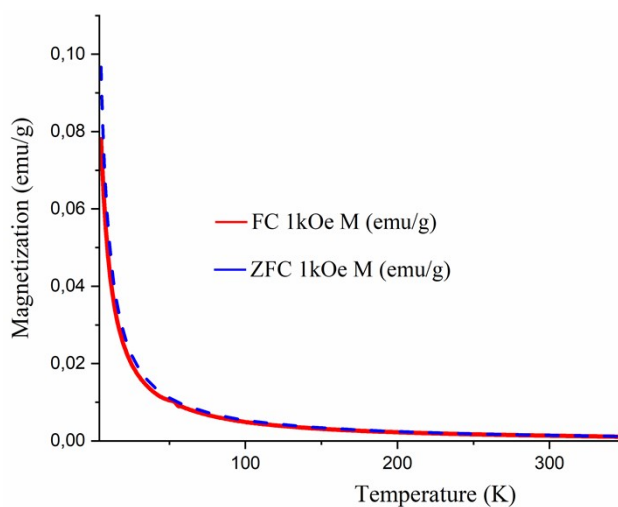

**Fig. 8S.** FC and ZFC curves.

## 5. Optical analysis for complex 1.

Diffuse reflectance spectra were made using a spectrophotometer equipped with an integrating sphere (Cary 5000). Emission and excitation spectra were measured using a photoluminescence spectrometer (Edinburgh Instrument FLS1000).

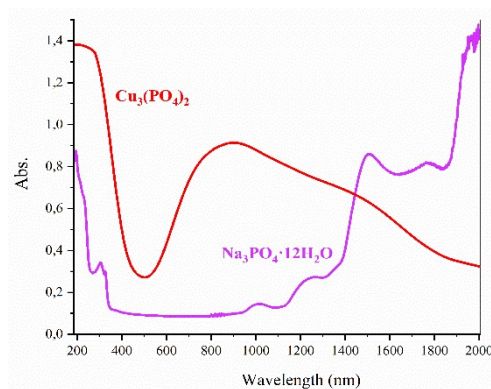

**Fig. 9S:** Diffuse reflectance spectra of the  $\text{Cu}_3(\text{PO}_4)_2$  and  $\text{Na}_3\text{PO}_4 \cdot 12\text{H}_2\text{O}$  matrices, as representative of the phosphate structures.
